# Supplementary material
Source: MDPI journal article supplement (https://www.mdpi.com/2673-4931/6/1/17)
Supplement: s1 [file s1]

## A cautionary note on amphibole geobarometry

*José F. Molina<sup>1</sup>, Aitor Cambeses<sup>1</sup>, Juan A. Moreno<sup>2</sup>, Irene Morales<sup>1</sup>, Concepción Lázaro<sup>1</sup>, Pilar Montero<sup>1</sup>,  
Fernando Bea<sup>1</sup>*

*1: Department of Mineralogy and Petrology, University of Granada, Spain*

*2: CICTERRA, CONICET, Universidad Nacional de Córdoba, Argentina*

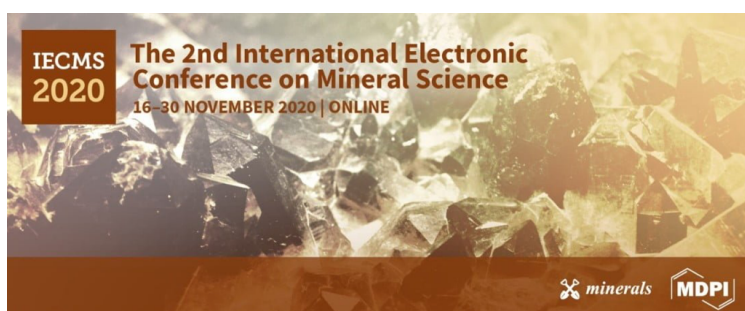

## Introduction

The classical Al-in-hornblende geobarometer has been very successful in determining emplacement depths of metaluminous cordilleran granitoid plutons that bear the buffering assemblage at near solidus conditions: hornblende-biotite-plagioclase-orthoclase-quartz-sphene-two Fe-Ti-oxides (or one Fe-Ti oxide + epidote)-melt-vapor (e.g., [1-3]).

Ridolfi et al. [4] and Ridolfi and Renzulli [5] derived empirical amphibole-only barometric expressions that could be potentially applied to a larger number of phenocrystic assemblages from volcanic rocks. However, Erdmann et al. [6] claimed that these geobarometers are inaccurate and can give untenable estimates.

A graphical geobarometer based on the partitioning of Al and Si between amphibole and plagioclase was derived by Fershtater [7] using amphibole-plagioclase compositional pairs of rocks from the Urals. More recently, Molina et al. [8] calibrated an empirical expression based on experimental data that can be applied to igneous and high-grade metamorphic rocks.

In order to compare the reliability of amphibole-only and amphibole-plagioclase barometry, in this work, we test the performance of the expressions of Ridolfi and Renzulli [5] and Molina et al. [8], using an experimental data set compiled from the literature that has been recently published by Molina et al. [9].

## Precision and accuracy of the amphibole-only geobarometers

### *Experimental data set*

The experimental data set compiled from the literature by Molina et al. [9] contains 154 data that fulfill the requirements of use of the amphibole-only barometric expressions by Ridolfi and Renzulli [5]: atomic Mg-number,  $Mg/(Mg+Fe^{2+})$  in amphibole greater than 0.5.

Temperature ranges from 650 to 1050°C and pressure from ca. 0.5 to 15 kbar (**Fig. 1**).

### *Test of the expressions*

The test carried out on the amphibole-only geobarometers from [5] reveals a poor performance, tending expressions 1A, 1B and 1C to underestimate pressures at  $P > 5$  kbar (**Fig. 2**), whereas the expressions 1D and 1E tend to overestimate pressures (**Fig. 3**).

## Test of the Al/Si amphibole-plagioclase geobarometer

### *Experimental data set*

We tested the amphibole-plagioclase geobarometer from Molina et al. [8] using the experimental data set by Molina et al. [9]. We noted a better performance for Qz-Amp-Pl and Ol-free Cpx-Amp-Pl assemblages with the amphibole compositional limits (23O; normalisation to 13-CNK): total Al > 1, Ti: 0.05-0.27 and Fe<sup>3+</sup><1.07.

The number of amphibole-plagioclase compositional pairs in the selected data subset are 30 for Qz-Amp-Pl assemblages and 22 for Ol-free Cpx-Amp-Pl assemblages, with a total of 47 observations.

For the Qz-Amp-Pl assemblages, temperature ranges from 650 to 880°C and pressure from ca. 2.5 to 13 kbar (**Fig. 4**), whereas for the Ol-free Cpx-Amp-Pl assemblages they ranges from 700 to 980°C and from ca. 0.5 to 15 kbar.

### *Test of the expression*

The test performed on the amphibole-plagioclase geobarometer for the for the Qz-Amp-Pl and Ol-free Cpx-Amp-Pl assemblages work well with a relations of calculated versus experimental pressures very close to the one-to-one line (**Fig. 5; Tables 1-3**).

The precision as estimated by the Root MSE parameter (see discussion in Molina et al. [8] and [9]) is close to  $\pm 1.7$  kbar for the Qz-Amp-Pl assemblages and to  $\pm 1.4$  kbar for the Ol-free Cpx-Amp-Pl assemblages (**Tables 1 and 2**); the expression yields an overall precision of  $\pm 1.6$  kbar for the full data set (**Table 3**).

### **Conclusions**

In accordance with Erdmann et al.[6], the test reveals unsustainable pressure estimates with the amphibole-only barometric expressions from Ridolfi and Renzulli [5]. Therefore we recommend to don't use the amphibole-only barometric expressions, calibrated for volcanic rocks, because of their very poor performance.

By contrast, the amphibole-plagioclase geobarometer from Molina et al. [8] works well for Qz-Amp-Pl and Ol-free-Cpx-Amp-Pl assemblages and yields a precision better than  $\pm 1.7$  kbar. The good performance of the amphibole-plagioclase geobarometer when applied to these mineral assemblages suggests that the partitioning of Al and Si between amphibole and plagioclase buffered by reactions involving Qz+Amp+Pl and Cpx+Amp+Pl. However, it is important to emphasize that the expression should be used for amphibole having > 1 apfu total Al, 0.05-0.27 apfu Ti: and < 1.07 apfu Fe<sup>3+</sup> to ensure more reliable pressure estimates.

## References

1. Hammarstrom, J.M., and Zen, E., 1986. Aluminum in hornblende, an empirical igneous geobarometer. *American Mineralogist* 71, 1297–1313.
- 2 Schmidt, M.W., 1992. Amphibole composition in tonalite as a function of pressure: an experimental calibration of the Al-in-hornblende barometer. *Contributions to Mineralogy and Petrology* 110, 304–310.
3. Anderson, J.L., and Smith, D.R., 1995. The effects of temperature and  $fO_2$  on the Al-in-hornblende barometer. *American Mineralogist* 80, 549–449.
4. Ridolfi, F., Renzulli, A., and Puerini, M., 2010. Stability and chemical equilibrium of amphibole in calc-alkaline magmas: an overview, new thermobarometric formulations and application to subduction-related volcanoes. *Contributions to Mineralogy and Petrology* 160, 45–66.
5. Ridolfi, F., Renzulli, A., 2012. Calcic amphiboles in calc-alkaline and alkaline magmas: thermobarometric and chemometric empirical equations valid up to 1130 °C and 2.2 GPa. *Contributions to Mineralogy and Petrology* 163, 877–895.
6. Erdmann, S., Martel, C., Pichavant, M., and Kushnir, A., 2014. Amphibole as an archivist of magmatic crystallization conditions: problems, potential, and implications for inferring magma storage prior to the paroxysmal 2010 eruption of Mount Merapi, Indonesia. *Contributions to Mineralogy and Petrology* 167, 1016
7. Fershtater, G.B., 1990. Empirical hornblende-plagioclase geobarometer. *Geokhimiya* 3, 328–335.
8. Molina, J.F., Moreno, J.A., Castro, A., Rodriguez, C., and Fershtater, G.B., 2015. Calcic amphibole thermobarometry in metamorphic and igneous rocks: new calibrations based on plagioclase/amphibole Al-Si partitioning and amphibole-liquid Mg partitioning. *Lithos* 232 286–305.
9. Molina, J.F., Cambeses, A., Moreno, J.A., Morales, I., Montero, P., and Bea, F., 2020. A reassessment of the amphibole-plagioclase NaSi–CaAl exchange thermometer with applications to igneous and high-grade metamorphic rocks. *American Mineralogist*, in press, <https://doi.org/10.2138/am-2020-7400>

## FIGURES

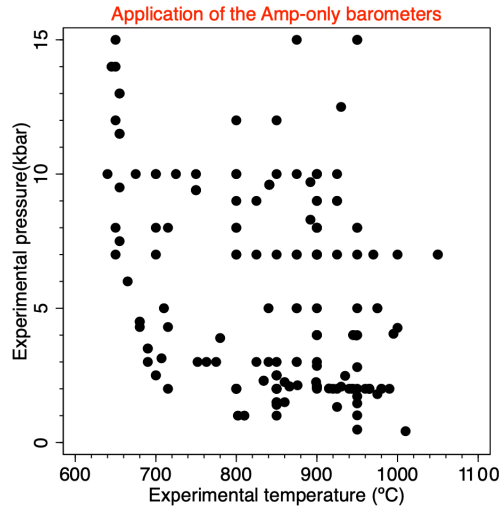

**Figure 1.** Experimental runs with amphibole having  $Mg/(Mg+Fe^{2+}) > 0.5$ . Data compiled from the literature by Molina et al. [9].

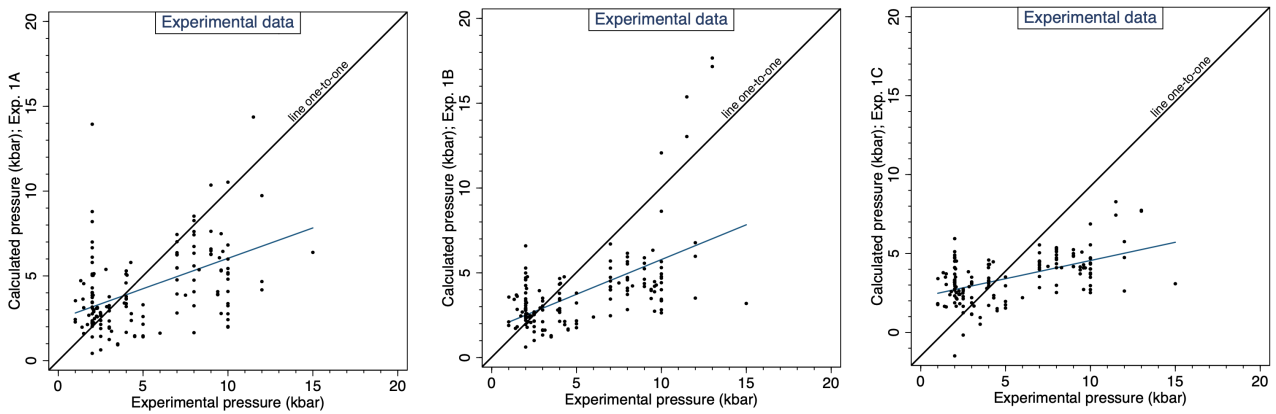

**Figure 2.** Calculated versus experimental pressures. Pressures estimated with the amphibole-only expressions 1A, 1B and 1C by Ridolfi and Renzulli [5]. Data compiled from the literature by Molina et al. [9].

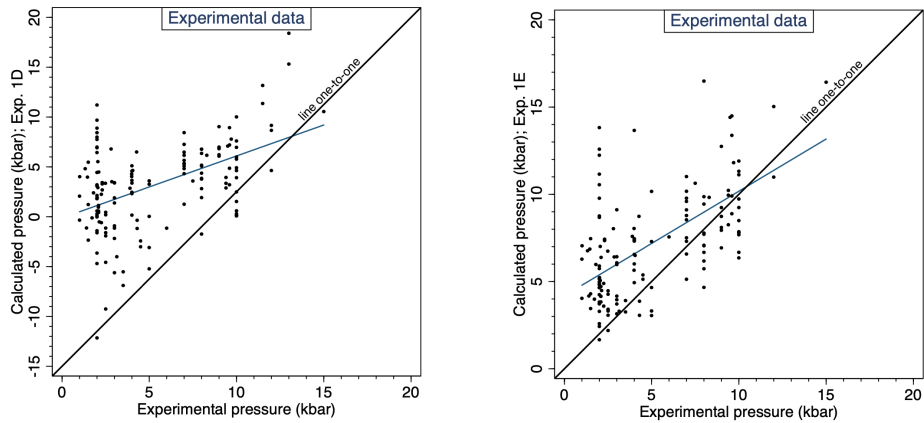

**Figure 3.** Calculated versus experimental pressures. Pressures estimated with the amphibole-only expressions 1D and 1E by Ridolfi and Renzulli [5]. Data compiled from the literature by Molina et al. [9].

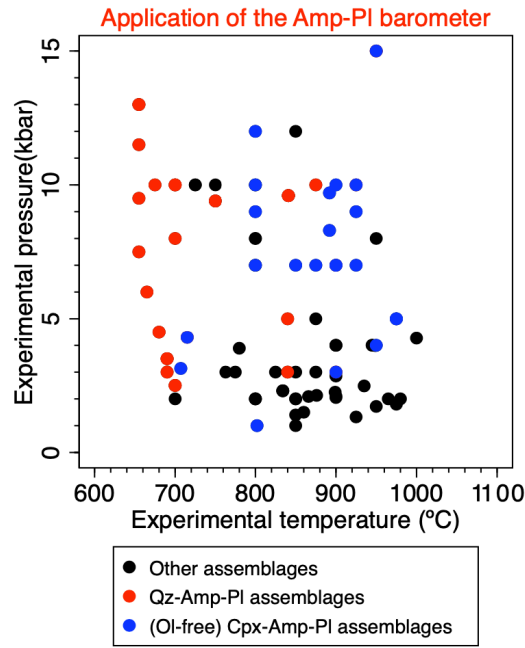

**Figure 4.** Experimental runs with amphibole having (apfu, 23O): total Al > 1, Ti: 0.05-0.27 and  $\text{Fe}^{3+} < 1.07$ . Data compiled from the literature by Molina et al. [9].

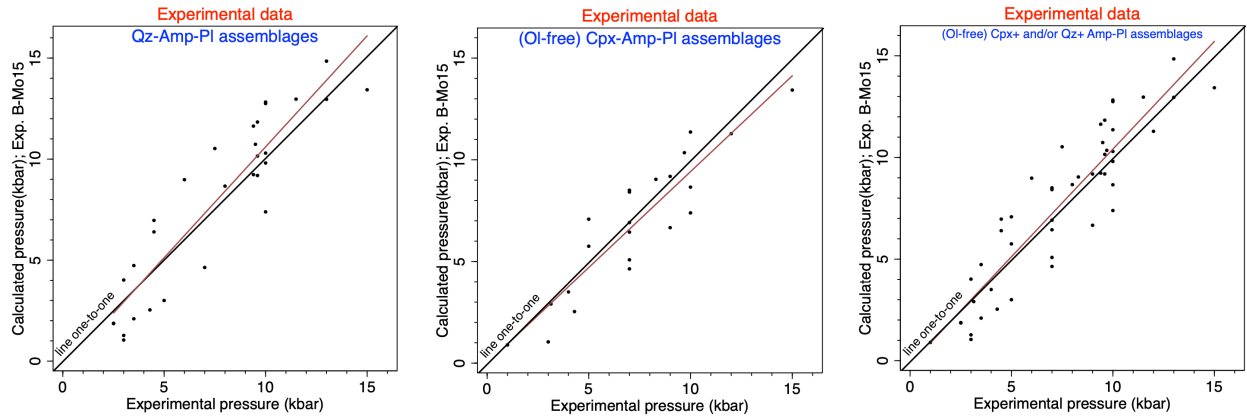

**Figure 5.** Calculated versus experimental pressures. Pressures estimated with the amphibole-plagioclase barometric expression B by Molina et al. [8]. Data compiled from the literature by Molina et al. [9].

## TABLES

**Table 1**

| Source   | SS                | df        | MS                | Number of obs | = | 30            |
|----------|-------------------|-----------|-------------------|---------------|---|---------------|
| Model    | <b>2340.55665</b> | <b>1</b>  | <b>2340.55665</b> | F(1, 29)      | = | <b>766.43</b> |
| Residual | <b>88.5610976</b> | <b>29</b> | <b>3.05383095</b> | Prob > F      | = | <b>0.0000</b> |
|          |                   |           |                   | R-squared     | = | <b>0.9635</b> |
|          |                   |           |                   | Adj R-squared | = | <b>0.9623</b> |
| Total    | <b>2429.11774</b> | <b>30</b> | <b>80.9705915</b> | Root MSE      | = | <b>1.7475</b> |

  

| pkbB_tc | Coef.           | Std. Err.       | t            | P> t         | [95% Conf. Interval] |                 |
|---------|-----------------|-----------------|--------------|--------------|----------------------|-----------------|
| pkbar   | <b>1.057755</b> | <b>.0382074</b> | <b>27.68</b> | <b>0.000</b> | <b>.9796117</b>      | <b>1.135898</b> |

**Table 2**

| Source   | SS                | df        | MS                | Number of obs | = | 22            |
|----------|-------------------|-----------|-------------------|---------------|---|---------------|
| Model    | <b>1234.73641</b> | <b>1</b>  | <b>1234.73641</b> | F(1, 21)      | = | <b>629.24</b> |
| Residual | <b>41.2073201</b> | <b>21</b> | <b>1.96225334</b> | Prob > F      | = | <b>0.0000</b> |
|          |                   |           |                   | R-squared     | = | <b>0.9677</b> |
|          |                   |           |                   | Adj R-squared | = | <b>0.9662</b> |
| Total    | <b>1275.94373</b> | <b>22</b> | <b>57.9974422</b> | Root MSE      | = | <b>1.4008</b> |

  

| pkbB_tc | Coef.           | Std. Err.       | t            | P> t         | [95% Conf. Interval] |                |
|---------|-----------------|-----------------|--------------|--------------|----------------------|----------------|
| pkbar   | <b>.9417183</b> | <b>.0375415</b> | <b>25.08</b> | <b>0.000</b> | <b>.8636465</b>      | <b>1.01979</b> |

**Table 3**

| Source   | SS                | df        | MS                | Number of obs | = | 47             |
|----------|-------------------|-----------|-------------------|---------------|---|----------------|
| Model    | <b>3326.0934</b>  | <b>1</b>  | <b>3326.0934</b>  | F(1, 46)      | = | <b>1330.07</b> |
| Residual | <b>115.031462</b> | <b>46</b> | <b>2.50068395</b> | Prob > F      | = | <b>0.0000</b>  |
|          |                   |           |                   | R-squared     | = | <b>0.9666</b>  |
|          |                   |           |                   | Adj R-squared | = | <b>0.9658</b>  |
| Total    | <b>3441.12486</b> | <b>47</b> | <b>73.2154226</b> | Root MSE      | = | <b>1.5814</b>  |

  

| pkbB_tc | Coef.           | Std. Err.       | t            | P> t         | [95% Conf. Interval] |                 |
|---------|-----------------|-----------------|--------------|--------------|----------------------|-----------------|
| pkbar   | <b>1.038719</b> | <b>.0284813</b> | <b>36.47</b> | <b>0.000</b> | <b>.9813893</b>      | <b>1.096049</b> |
